# Supplementary material for: Plasmonic-based sensitivity enhancement of a Goos–Hänchen shift biosensor using transition metal dichalcogenides: a theoretical insight
Source: Royal Society of Chemistry journal article supplement (doi:10.1039/d0nj01890b), 2020-01-01
Supplement: d0nj01890b1.pdf [file d0nj01890b1.pdf]

## Supporting Information

### Plasmonic-Based Sensitivity Enhancement of Goos-Hänchen Shift Biosensor Using Transition Metal Dichalcogenides: A Theoretical Insight

Yan Guo<sup>\*ab</sup>, Nishtha Manish Singh<sup>c</sup>, Chandreyee Manas Dasb<sup>c</sup>, Qingling Ouyang<sup>bc</sup>, Lixing Kang<sup>bc</sup>, Kuanbiao Li<sup>d</sup>, Philippe Coquet<sup>be</sup>, and Ken-Tye Yong<sup>\*bc</sup>

<sup>a</sup> School of Automation, Hangzhou Dianzi University, Hangzhou 310018, Zhejiang, China

[guoyan@hdu.edu.cn](mailto:guoyan@hdu.edu.cn)

<sup>b</sup> CINTRA CNRS/NTU/THALES, UMI 3288, Research Techno Plaza, 50 Nanyang Drive, Border X Block, Singapore, 637553

[ktyong@ntu.edu.sg](mailto:ktyong@ntu.edu.sg)

<sup>c</sup> School of Electrical and Electronic Engineering, Nanyang Technological University, 50 Nanyang Avenue, Singapore, 639798

<sup>d</sup> HANGZHOU HANGYANG Co. Ltd, Hangzhou 310014, Zhejiang, China

<sup>e</sup> Institut d'Electronique, de Microélectronique et de Nanotechnologie (IEMN), CNRS UMR 8520 -Université de Lille 1, 59650 Villeneuve d' Ascq, France

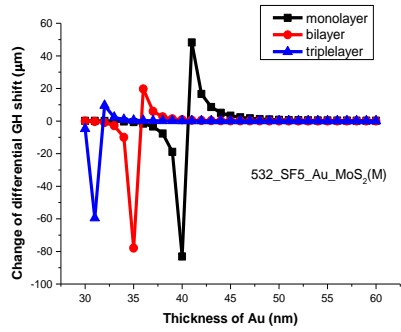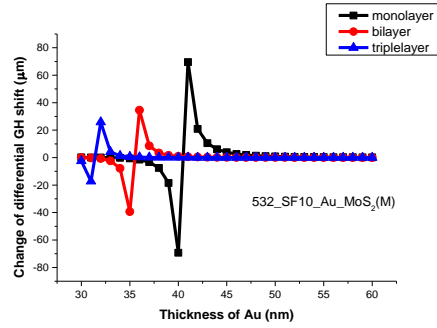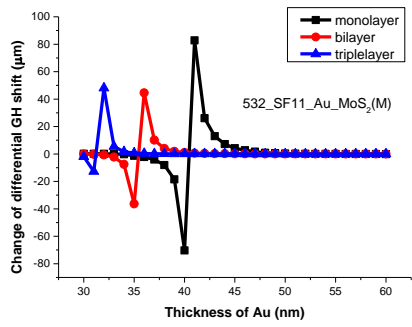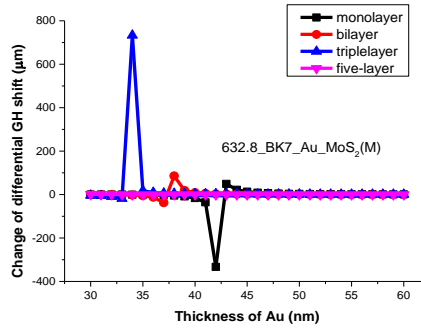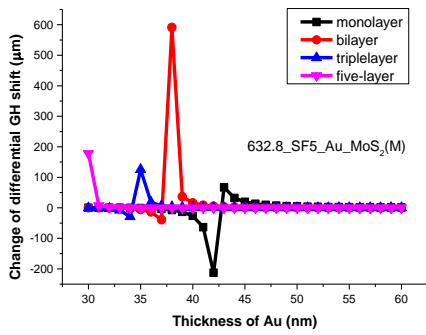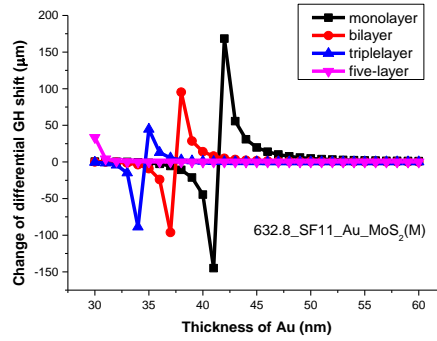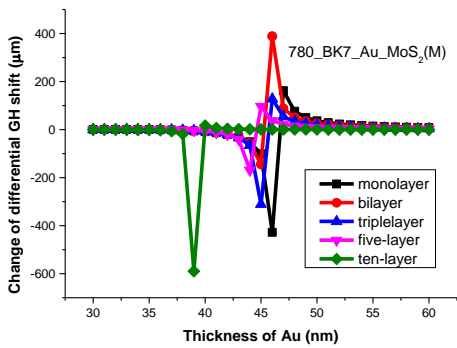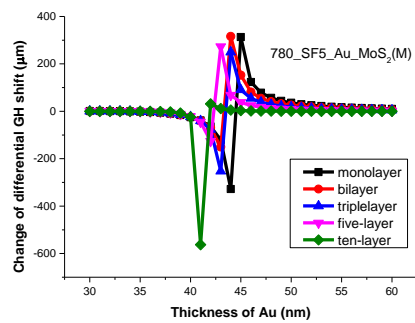

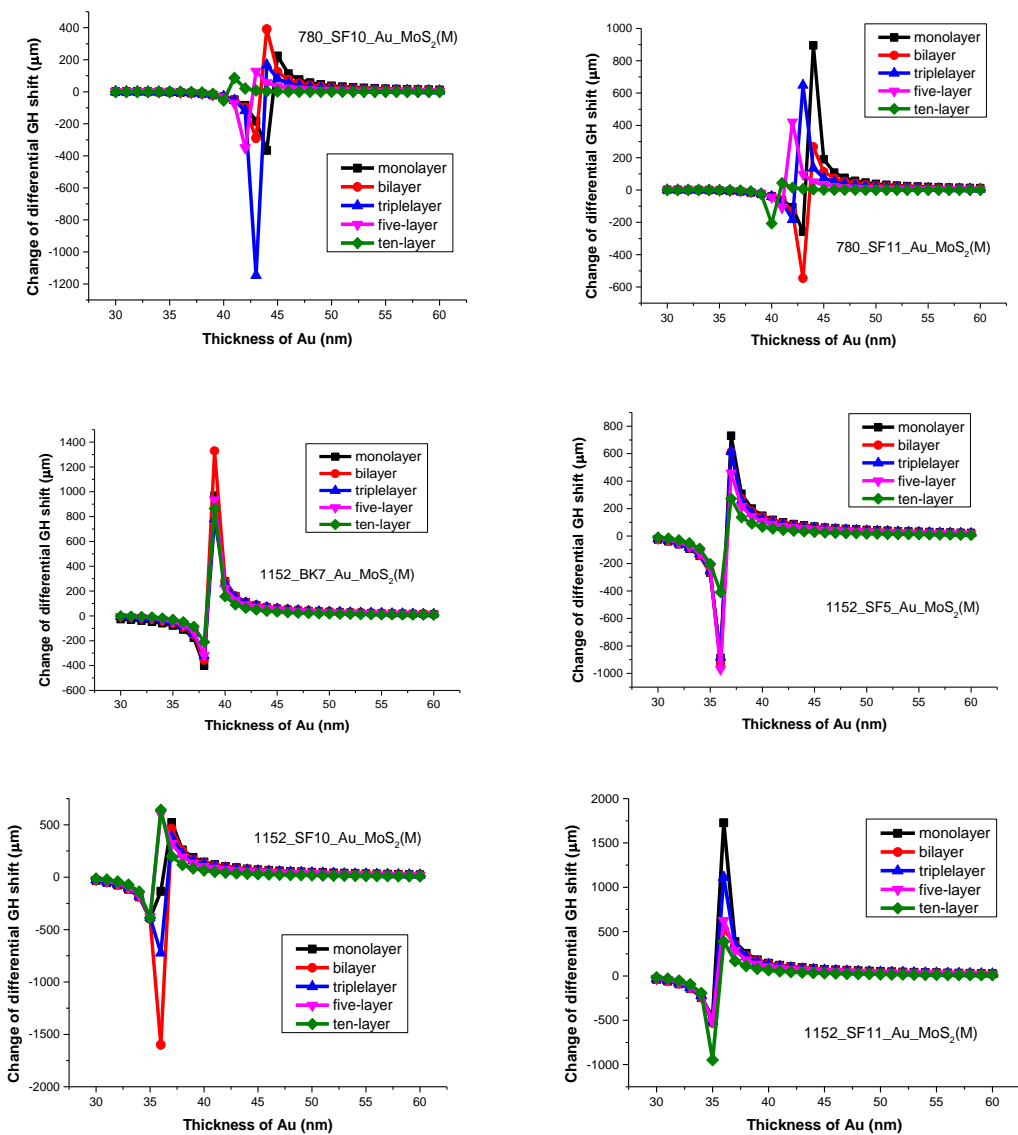

**Fig. S1** The change in differential GH shift as a function of the thickness of gold thin film for different number of MoS<sub>2</sub> layers but without graphene ( $L=0$ ) at different excitation wavelengths coupled by the four prisms.

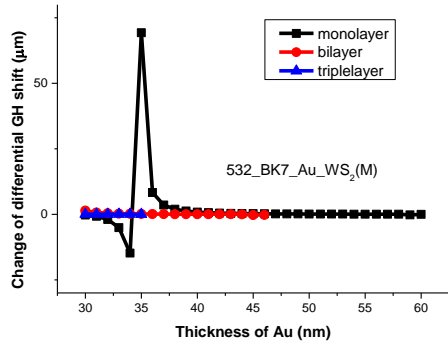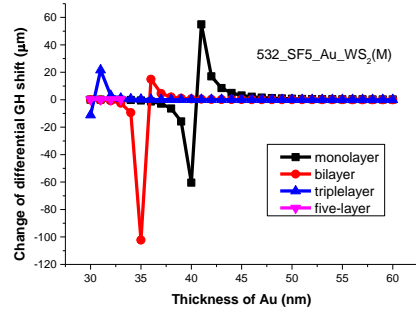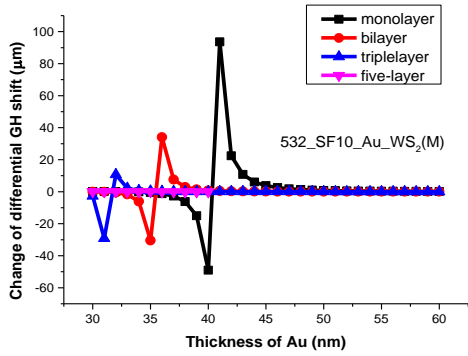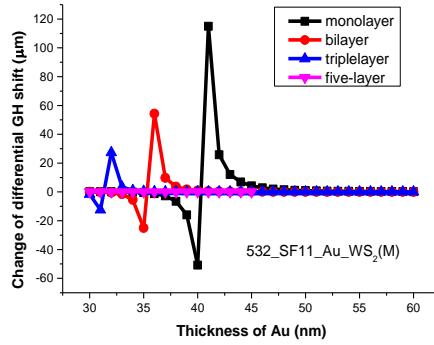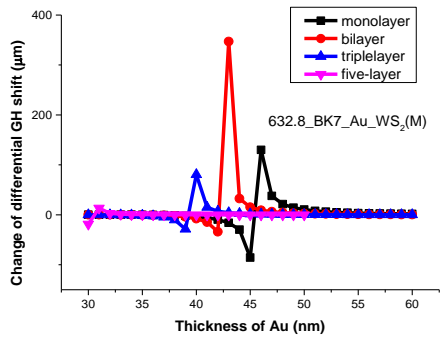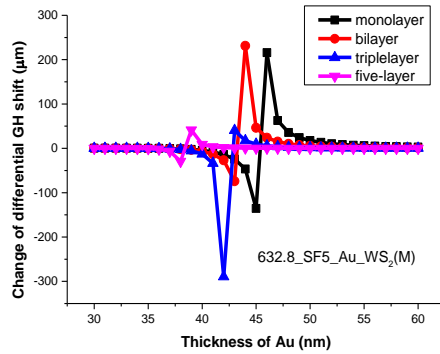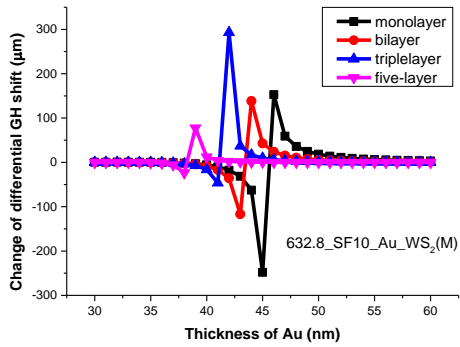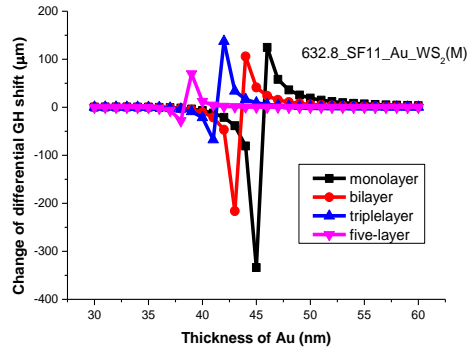

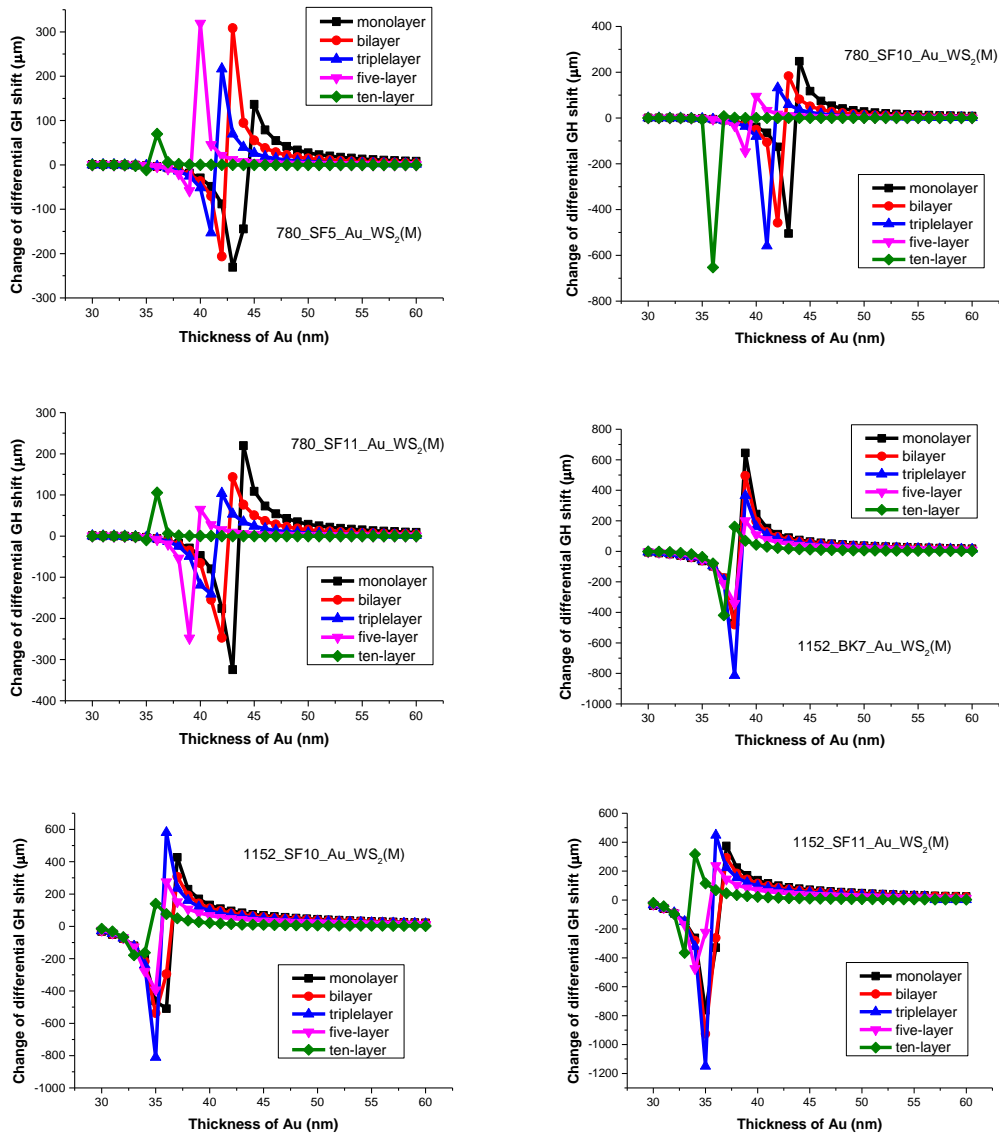

**Fig. S2** The change in differential GH shift as a function of the thickness of gold thin film for different number of WS<sub>2</sub> layers but without graphene ( $L=0$ ) at different excitation wavelengths coupled by the four prisms.

**Table S1** Measured parameters- SPR angle, minimum reflectivity, FWTM, change in differential GH shift, sensitivity, FoM and enhancement factor- at the optimal Au thickness with different layers of graphene and MoS<sub>2</sub> at different prisms and excitation wavelengths for the fixed RI change of  $\Delta n=0.005$ .

| Fixed Parameters |       |        |              |                      | Measured Parameters |                      |      |                            |                     |                       |        |
|------------------|-------|--------|--------------|----------------------|---------------------|----------------------|------|----------------------------|---------------------|-----------------------|--------|
| $\lambda$ (nm)   | Prism | d (nm) | Graphene (L) | MoS <sub>2</sub> (M) | $\theta_{SPR}$ (°)  | $R_{min}$            | FWTM | $ \Delta GHs $ ( $\mu m$ ) | S ( $\mu m/RIU$ )   | FoM ( $\times 10^4$ ) | $\eta$ |
| 532              | BK7   | 30     | 3            | 1                    | 80.49               | $1 \times 10^{-6}$   | 5.21 | 420                        | $8.4 \times 10^4$   | 1.6                   | 5.53   |
| 632.8            | SF5   | 42     | 0            | 1                    | 60.47               | $4.1 \times 10^{-7}$ | 1.58 | 841                        | $1.682 \times 10^5$ | 10.65                 | 2.40   |
| 632.8            | SF5   | 38     | 0            | 2                    | 61.76               | $5 \times 10^{-6}$   | 2.74 | 591                        | $1.182 \times 10^5$ | 4.31                  | 1.68   |
| 632.8            | SF5   | 31     | 4            | 3                    | 65.10               | $1 \times 10^{-6}$   | 5.88 | 678                        | $1.356 \times 10^5$ | 2.31                  | 1.93   |
| 632.8            | SF10  | 34     | 6            | 1                    | 59.42               | $1 \times 10^{-6}$   | 3.37 | 1014                       | $2.028 \times 10^5$ | 6.02                  | 3.34   |
| 632.8            | SF10  | 30     | 5            | 3                    | 62.33               | $1 \times 10^{-6}$   | 6.23 | 648                        | $1.296 \times 10^5$ | 2.08                  | 2.14   |
| 632.8            | SF11  | 36     | 4            | 1                    | 55.99               | $2 \times 10^{-6}$   | 2.62 | 878                        | $1.756 \times 10^5$ | 6.7                   | 1.74   |
| 632.8            | SF11  | 40     | 1            | 1                    | 55.09               | $7 \times 10^{-6}$   | 1.73 | 834                        | $1.668 \times 10^5$ | 9.64                  | 1.65   |
| 780              | BK7   | 44     | 1            | 2                    | 68.58               | $2.4 \times 10^{-5}$ | 1.46 | 632                        | $1.264 \times 10^5$ | 8.66                  | 1.77   |
| 780              | BK7   | 41     | 3            | 3                    | 70.10               | $7 \times 10^{-6}$   | 2.20 | 692                        | $1.384 \times 10^5$ | 6.29                  | 1.94   |
| 780              | BK7   | 39     | 0            | 10                   | 80.85               | $1 \times 10^{-6}$   | 4.89 | 589                        | $1.178 \times 10^5$ | 2.41                  | 1.65   |
| 780              | SF10  | 31     | 12           | 1                    | 57.30               | $3 \times 10^{-6}$   | 3.12 | 664                        | $1.328 \times 10^5$ | 4.26                  | 1.84   |
| 780              | SF10  | 41     | 2            | 1                    | 55.18               | $5 \times 10^{-6}$   | 1.01 | 579                        | $1.158 \times 10^5$ | 11.47                 | 1.61   |
| 780              | SF10  | 34     | 8            | 2                    | 57.05               | $5 \times 10^{-6}$   | 2.47 | 721                        | $1.442 \times 10^5$ | 5.84                  | 2.00   |
| 780              | SF10  | 35     | 7            | 2                    | 56.80               | $1 \times 10^{-6}$   | 2.21 | 1353                       | $2.706 \times 10^5$ | 12.24                 | 3.75   |
| 780              | SF10  | 36     | 6            | 2                    | 56.56               | $7 \times 10^{-6}$   | 1.97 | 961                        | $1.922 \times 10^5$ | 9.76                  | 2.61   |
| 780              | SF10  | 38     | 4            | 2                    | 56.12               | $7 \times 10^{-6}$   | 1.57 | 1167                       | $2.334 \times 10^5$ | 14.87                 | 3.24   |
| 780              | SF10  | 43     | 0            | 3                    | 55.86               | $1.6 \times 10^{-5}$ | 1.05 | 1146                       | $2.292 \times 10^5$ | 21.83                 | 3.18   |
| 780              | SF10  | 33     | 9            | 3                    | 58.12               | $4 \times 10^{-6}$   | 3.21 | 671                        | $1.342 \times 10^5$ | 4.18                  | 1.86   |
| 780              | SF10  | 39     | 3            | 3                    | 56.53               | $5 \times 10^{-6}$   | 1.61 | 1048                       | $2.096 \times 10^5$ | 13.02                 | 2.91   |
| 780              | SF10  | 30     | 13           | 5                    | 61.75               | $1 \times 10^{-6}$   | 6.26 | 628                        | $1.256 \times 10^5$ | 2.0                   | 1.74   |
| 780              | SF11  | 44     | 0            | 1                    | 52.45               | $4.2 \times 10^{-5}$ | 0.68 | 895                        | $1.79 \times 10^5$  | 26.32                 | 2.17   |
| 780              | SF11  | 30     | 13           | 1                    | 55.02               | $1 \times 10^{-6}$   | 3.25 | 1285                       | $2.57 \times 10^5$  | 7.91                  | 3.11   |
| 780              | SF11  | 34     | 8            | 1                    | 53.89               | $3 \times 10^{-6}$   | 1.96 | 1524                       | $3.048 \times 10^5$ | 15.55                 | 3.69   |
| 780              | SF11  | 38     | 4            | 1                    | 55.13               | $7 \times 10^{-6}$   | 1.26 | 906                        | $1.812 \times 10^5$ | 14.38                 | 2.19   |
| 780              | SF11  | 42     | 1            | 1                    | 52.62               | $1.9 \times 10^{-5}$ | 0.82 | 970                        | $1.94 \times 10^5$  | 23.66                 | 2.35   |
| 780              | SF11  | 43     | 0            | 3                    | 53.40               | $3.4 \times 10^{-5}$ | 0.94 | 649                        | $1.298 \times 10^5$ | 13.81                 | 1.57   |
| 780              | SF11  | 34     | 7            | 5                    | 56.74               | $3 \times 10^{-6}$   | 3.45 | 804                        | $1.608 \times 10^5$ | 4.66                  | 1.94   |
| 1152             | SF5   | 31     | 7            | 1                    | 55.77               | $1 \times 10^{-5}$   | 1.04 | 2203                       | $4.406 \times 10^5$ | 42.37                 | 2.88   |
| 1152             | SF5   | 34     | 3            | 1                    | 55.40               | $8 \times 10^{-6}$   | 0.73 | 1956                       | $3.912 \times 10^5$ | 53.59                 | 2.55   |
| 1152             | SF5   | 34     | 3            | 2                    | 55.54               | $2.8 \times 10^{-5}$ | 0.78 | 1952                       | $3.904 \times 10^5$ | 50.05                 | 2.55   |
| 1152             | SF5   | 31     | 7            | 3                    | 56.11               | $5 \times 10^{-6}$   | 1.19 | 2576                       | $5.152 \times 10^5$ | 43.29                 | 3.36   |
| 1152             | SF5   | 33     | 4            | 5                    | 56.15               | $3 \times 10^{-6}$   | 1.04 | 1566                       | $3.132 \times 10^5$ | 30.12                 | 2.04   |
| 1152             | SF5   | 31     | 7            | 10                   | 57.69               | $1 \times 10^{-6}$   | 1.91 | 1630                       | $3.26 \times 10^5$  | 17.07                 | 2.13   |
| 1152             | SF11  | 36     | 0            | 1                    | 50.61               | $7.7 \times 10^{-5}$ | 0.47 | 1728                       | $3.456 \times 10^5$ | 73.53                 | 1.54   |
| 1152             | SF11  | 31     | 6            | 1                    | 51.08               | $3 \times 10^{-6}$   | 0.84 | 2694                       | $5.388 \times 10^5$ | 64.14                 | 2.41   |
| 1152             | SF11  | 34     | 2            | 3                    | 51.01               | $6 \times 10^{-6}$   | 0.66 | 2257                       | $4.514 \times 10^5$ | 68.39                 | 2.02   |
| 1152             | SF11  | 33     | 3            | 3                    | 51.10               | $3.7 \times 10^{-5}$ | 0.74 | 1760                       | $3.52 \times 10^5$  | 47.57                 | 1.57   |
| 1152             | SF11  | 33     | 3            | 5                    | 51.39               | $4 \times 10^{-6}$   | 0.84 | 2132                       | $4.264 \times 10^5$ | 50.76                 | 1.91   |

**Table S2** Measured parameters- SPR angle, minimum reflectivity, FWTM, changes in differential GH shift, sensitivity, FoM and enhancement factor- at the optimal Au thickness along with different layers of graphene and WS<sub>2</sub> at different prisms and excitation wavelengths for the fixed RI change of  $\Delta n=0.005$ .

| Fixed Parameters |       |        |              |                     | Measured Parameters |                      |      |                                   |                                |                          |        |
|------------------|-------|--------|--------------|---------------------|---------------------|----------------------|------|-----------------------------------|--------------------------------|--------------------------|--------|
| $\lambda$ (nm)   | Prism | d (nm) | Graphene (L) | WS <sub>2</sub> (M) | $\theta_{SPR}$ (°)  | $R_{min}$            | FWTM | $ \Delta GH_s $ ( $\mu\text{m}$ ) | S ( $\mu\text{m}/\text{RIU}$ ) | FoM ( $\times 10^{-4}$ ) | $\eta$ |
| 532              | BK7   | 31     | 2            | 1                   | 81.0                | $6 \times 10^{-6}$   | 4.99 | 211                               | $4.22 \times 10^4$             | 0.85                     | 2.78   |
| 532              | SF11  | 33     | 2            | 2                   | 62.42               | $1 \times 10^{-6}$   | 5.82 | 496                               | $9.92 \times 10^4$             | 1.7                      | 1.43   |
| 632.8            | SF5   | 39     | 2            | 3                   | 65.17               | $4 \times 10^{-6}$   | 3.63 | 463                               | $9.26 \times 10^4$             | 2.55                     | 1.32   |
| 632.8            | SF10  | 35     | 7            | 1                   | 59.98               | $1 \times 10^{-7}$   | 3.49 | 1059                              | $2.118 \times 10^5$            | 6.67                     | 3.50   |
| 632.8            | SF11  | 36     | 5            | 2                   | 58.11               | $1 \times 10^{-6}$   | 3.51 | 1724                              | $3.448 \times 10^5$            | 9.82                     | 3.41   |
| 780              | BK7   | 40     | 4            | 1                   | 68.80               | $1 \times 10^{-6}$   | 1.95 | 1729                              | $3.458 \times 10^5$            | 17.73                    | 4.86   |
| 780              | BK7   | 33     | 11           | 2                   | 72.33               | $1 \times 10^{-7}$   | 4.49 | 870                               | $1.74 \times 10^5$             | 3.88                     | 2.44   |
| 780              | BK7   | 43     | 1            | 2                   | 69.14               | $9 \times 10^{-6}$   | 1.71 | 918                               | $1.836 \times 10^5$            | 10.74                    | 2.58   |
| 780              | SF10  | 41     | 0            | 3                   | 56.51               | $3.1 \times 10^{-5}$ | 1.43 | 559                               | $1.118 \times 10^5$            | 7.82                     | 1.55   |
| 780              | SF10  | 36     | 0            | 10                  | 70.82               | $1 \times 10^{-7}$   | 8.51 | 652                               | $1.304 \times 10^5$            | 1.53                     | 1.81   |
| 780              | SF10  | 38     | 4            | 1                   | 55.73               | $1.5 \times 10^{-5}$ | 1.41 | 688                               | $1.376 \times 10^5$            | 9.76                     | 1.91   |
| 780              | SF10  | 39     | 3            | 1                   | 55.54               | $7 \times 10^{-6}$   | 1.25 | 1323                              | $2.646 \times 10^5$            | 21.17                    | 3.68   |
| 780              | SF10  | 36     | 5            | 2                   | 56.81               | $7 \times 10^{-6}$   | 2.08 | 665                               | $1.33 \times 10^5$             | 6.39                     | 1.85   |
| 780              | SF10  | 30     | 12           | 3                   | 60.16               | $1 \times 10^{-7}$   | 5.31 | 539                               | $1.078 \times 10^5$            | 2.03                     | 1.50   |
| 780              | SF11  | 42     | 0            | 2                   | 53.24               | $5 \times 10^{-6}$   | 1.00 | 813                               | $1.626 \times 10^5$            | 16.26                    | 1.97   |
| 780              | SF11  | 41     | 0            | 3                   | 54.0                | $1.6 \times 10^{-5}$ | 1.32 | 689                               | $1.378 \times 10^5$            | 10.44                    | 1.67   |
| 780              | SF11  | 40     | 2            | 1                   | 52.94               | $1.3 \times 10^{-5}$ | 1.02 | 1345                              | $2.69 \times 10^5$             | 26.37                    | 3.25   |
| 780              | SF11  | 30     | 12           | 2                   | 56.14               | $1 \times 10^{-7}$   | 4.05 | 1613                              | $3.226 \times 10^5$            | 7.97                     | 3.91   |
| 780              | SF11  | 38     | 3            | 2                   | 53.85               | $4 \times 10^{-6}$   | 1.51 | 850                               | $1.7 \times 10^5$              | 11.26                    | 2.06   |
| 780              | SF11  | 34     | 5            | 5                   | 57.91               | $1 \times 10^{-6}$   | 4.25 | 873                               | $1.746 \times 10^5$            | 4.11                     | 2.11   |
| 1152             | BK7   | 34     | 6            | 1                   | 64.57               | $2 \times 10^{-6}$   | 1.21 | 2735                              | $5.47 \times 10^5$             | 45.21                    | 1.61   |
| 1152             | BK7   | 36     | 3            | 2                   | 64.51               | $6 \times 10^{-6}$   | 1.03 | 2961                              | $5.922 \times 10^5$            | 57.5                     | 1.74   |
| 1152             | SF5   | 36     | 0            | 3                   | 55.59               | $4.4 \times 10^{-5}$ | 0.70 | 1449                              | $2.898 \times 10^5$            | 41.4                     | 1.89   |
| 1152             | SF5   | 33     | 4            | 1                   | 55.55               | $1 \times 10^{-6}$   | 0.83 | 3035                              | $6.07 \times 10^5$             | 73.13                    | 3.96   |
| 1152             | SF5   | 35     | 1            | 2                   | 55.49               | $3 \times 10^{-5}$   | 0.70 | 1475                              | $2.95 \times 10^5$             | 42.14                    | 1.92   |
| 1152             | SF5   | 30     | 8            | 3                   | 56.46               | $4 \times 10^{-6}$   | 1.45 | 2726                              | $5.452 \times 10^5$            | 37.6                     | 3.56   |
| 1152             | SF5   | 33     | 3            | 5                   | 56.42               | $4 \times 10^{-6}$   | 1.18 | 2713                              | $5.426 \times 10^5$            | 45.98                    | 3.54   |
| 1152             | SF11  | 33     | 3            | 1                   | 50.89               | $9 \times 10^{-6}$   | 0.68 | 2264                              | $4.528 \times 10^5$            | 66.59                    | 2.02   |
| 1152             | SF11  | 32     | 4            | 2                   | 51.16               | $2.4 \times 10^{-5}$ | 0.82 | 1889                              | $3.778 \times 10^5$            | 46.07                    | 1.69   |

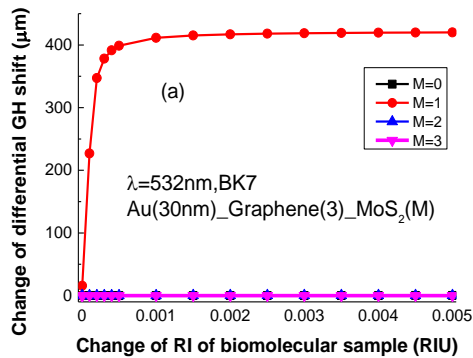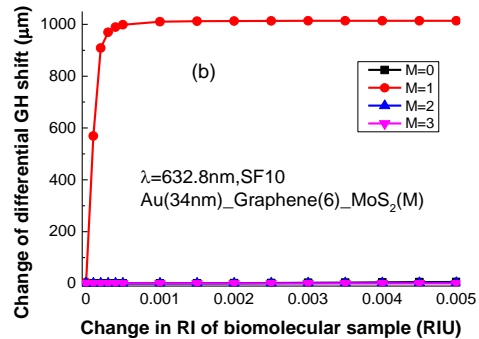

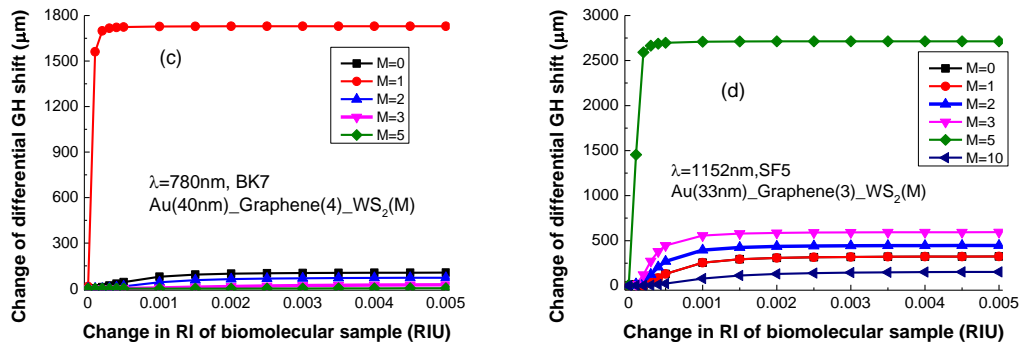

**Fig. S3** Optimization the layer numbers of MS<sub>2</sub> to achieve large differential GH shift change with respect to the RI change of biomolecular samples for the four configurations.

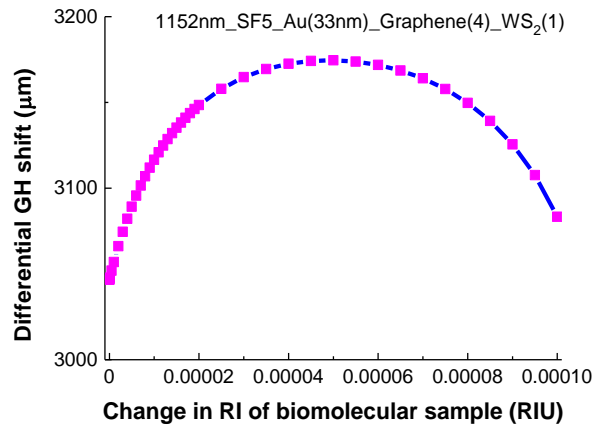

**Fig. S4** Differential GH shift *GHs* with respect to the RI change of biomolecular solutions for the configuration of monolayer WS<sub>2</sub> with four-layer graphene structured on 33 nm Au illuminated by 1152 nm coupled by SF5 prism.
